# Supplementary material for: MAGE: An Open-Source Tool for Meta-Analysis of Gene Expression Studies
Source: MDPI journal article supplement (doi:10.3390/biology11060895), 2022-06-10
Supplement: s1 [file s1]

# **MAGE: a python package for Meta-analysis of gene expression studies**

Ioannis A. Tamposis<sup>#</sup>, Georgios A. Manios<sup>#</sup>, Theodosia Charitou, Konstantina E. Vennou,  
Panagiota I. Kontou and Pantelis G. Bagos<sup>\*</sup>

Department of Computer Science and Biomedical Informatics, University of Thessaly, 35100 Lamia, Greece

<sup>#</sup> These authors contributed equally

<sup>\*</sup>To whom correspondence should be addressed.

## **Supplementary Material**

# Usage scenario

## PART A – Set up tool parameters

Meta-analysis of gene expression data is widely used to identify differentially expressed genes that can be used as diagnostic and prognostic biomarkers of a disease. MAGE (Meta-Analysis of Gene Expression) can be used to perform a broad range of tasks related to meta-analysis of gene expression data. Figure S1 shows a schematic representation of the workflow, which is the example presented in this scenario.

A dataset of ten published microarray case-control studies on placental samples, regarding preeclampsia [1-10] was used. These data were previously analyzed in a meta-analysis conducted by Vennou et al [11]. In the first step each study file should be uploaded in tab-delimited format (.txt) as shown in the Figure S2. The first row should be named ID and the next columns contain the experiment subjects' name (e.g., GSMxxx). The second row should be named CLASS and the next columns contain subjects' status (for an analysis with a single outcome the CONTROL and the CASE was used to indicate the status of the controls and the patients of the study). The subsequent lines should have either the gene symbols identifiers of the experiment or the platforms probe identifiers (if the GISU module will be used) and the expression value of each probe per subject.

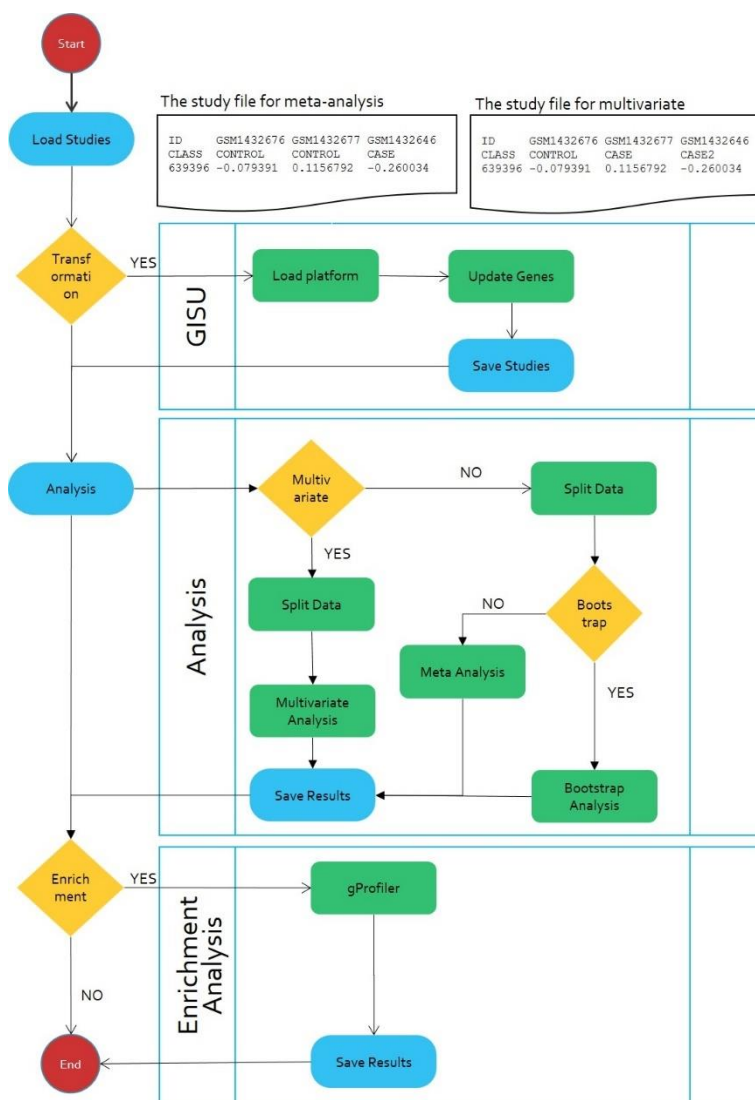

Figure S1. Schematic representation of the workflow

Drag & drop files here

Open the file Browser

Click the individual cell to activate each process. Drag and drop or select a file to add a new data set. The maximum total number of studies allowed is 15. When all data sets have been processed, Click Start Upload Files button to proceed.

second line contains the subject's class for controls and cases. The maximum file size per upload is 30M. Data can be uploaded as a tab-delimited text file (.txt). Example:

|        |            |            |            |
|--------|------------|------------|------------|
| ID     | GSM1432676 | GSM1432677 | GSM1432646 |
| CLASS  | CONTROL    | CONTROL    | CASE       |
| 639396 | -0.079391  | 0.1156792  | -0.260034  |

Download sample files from [here](#) for meta-analysis

|        |            |            |            |
|--------|------------|------------|------------|
| ID     | GSM1432676 | GSM1432677 | GSM1432646 |
| CLASS  | CONTROL    | CASE       | CASE2      |
| 639396 | -0.079391  | 0.1156792  | -0.260034  |

Download sample files from [here](#) for multivariate

File List

▶ Start Upload Files

Clear List

■ Stop Upload Files

| Data      | FileSize | Class        |  | Status  | Progress    |
|-----------|----------|--------------|--|---------|-------------|
| PE_4.txt  | 2468440  | CONTROL,CASE |  | Waiting | <div></div> |
| PE_5.txt  | 2355715  | CASE,CONTROL |  | Waiting | <div></div> |
| PE_6.txt  | 5642556  | CONTROL,CASE |  | Waiting | <div></div> |
| PE_7.txt  | 2783820  | CASE,CONTROL |  | Waiting | <div></div> |
| PE_8.txt  | 9623612  | CONTROL,CASE |  | Waiting | <div></div> |
| PE_9.txt  | 9466353  | CONTROL,CASE |  | Waiting | <div></div> |
| PE_10.txt | 28694954 | CONTROL,CASE |  | Waiting | <div></div> |
| PE_1.txt  | 2048905  | CASE,CONTROL |  | Waiting | <div></div> |
| PE_2.txt  | 3782124  | CONTROL,CASE |  | Waiting | <div></div> |
| PE_3.txt  | 3664602  | CASE,CONTROL |  | Waiting | <div></div> |

**Figure S2. The web interface of the tool.**

| ID       | GSM106249 | GSM106250 | GSM106274 | GSM106275 | GSM106276 | GSM106277 | GSM106278 | GSM106279 | GSM106280 | GSM106281 | GSM106282 | GSM106283 | GSM10628  | GSM106285 |
|----------|-----------|-----------|-----------|-----------|-----------|-----------|-----------|-----------|-----------|-----------|-----------|-----------|-----------|-----------|
| CLASS    | CONTROL   | CONTROL   | CONTROL   | CONTROL   | CASE      |
| A1BG     | 0.07175   | -0.00749  | 0.06815   | 0.063     | 0.00335   | 0.0205    | 0.00099   | 0.03792   | 0.0278    | 0.03205   | -0.02005  | 0.03245   | 0.01948   | 0.05175   |
| A1BG-AS1 | -0.0637   | 0.182     | -0.148    | -0.176    | -0.28     | -0.174    | -0.0894   | -0.333    | -0.232    | -0.13     | 0.0734    | -0.203    | -0.0949   | -0.215    |
| A1CF     | 0.0927    | 0.117     | -0.0838   | -0.00781  | -0.0689   | -0.0132   | -0.0774   | -0.617    | -0.11     | 0.0539    | -0.0637   | -0.0975   | -0.132    | -0.183    |
| A2M      | -0.00156  | 0.0791    | 0.0443    | -0.0961   | -0.251    | -0.279    | -0.15     | -0.217    | 0.0465    | -0.128    | 0.0422    | -0.0206   | -0.351    | -0.206    |
| A2ML1    | 0.0367    | -0.0748   | 0.0633    | 0.138     | 0.104     | 0.039     | 0.0184    | 0.0108    | 0.262     | -0.000297 | -0.112    | 0.0158    | 0.0654    | 0.0512    |
| A4GALT   | -0.253    | 0.0246    | -0.0369   | 0.0294    | -0.205    | -0.115    | -0.142    | -0.213    | 0.098     | -0.195    | -0.0864   | -0.0518   | 0.0143    | -0.106    |
| A4GNT    | 0.0103    | -0.174    | -0.000934 | 0.168     | 0.216     | 0.0965    | 0.0852    | 0.115     | 0.107     | -0.0177   | -0.197    | 0.0167    | -0.127    | 0.045     |
| AAAS     | -0.0785   | -0.0139   | -0.0564   | -0.0718   | -0.0997   | -0.0892   | -0.0491   | -0.116    | -0.0841   | -0.0991   | -0.039    | -0.0849   | -0.103    | -0.0678   |
| AACS     | -0.0277   | 0.0988    | -0.0469   | -0.159    | 0.12      | 0.139     | 0.0441    | 0.0506    | -0.0381   | 0.00619   | 0.14      | -0.0544   | 0.0352    | -0.0435   |
| AADAC    | -0.0393   | -0.0871   | 0.163     | -0.0743   | -0.0301   | 0.0784    | -0.0819   | -0.0669   | -0.0219   | -0.201    | -0.319    | -0.0289   | 0.0576    | -0.0164   |
| AADACL2  | 0.0327    | 0.0431    | 0.0815    | 0.0727    | 0.0769    | 0.0991    | 0.092     | 0.088     | 0.0553    | -0.0515   | 0.0652    | 0.0134    | 0.116     | 0.0225    |
| AADAT    | 0.0761    | 0.0525    | -0.079    | 0.199     | 0.0124    | -0.0215   | 0.0822    | 0.104     | 0.0013    | 0.143     | 0.356     | 0.0865    | 0.237     | 0.0485    |
| AAED1    | 0.234     | 0.109     | -0.0757   | 0.0351    | -0.118    | 0.032     | 0.128     | 0.231     | 0.125     | 0.166     | 0.455     | 0.0837    | 0.0457    | 0.052     |
| AAGAB    | 0.0257    | -0.0424   | 0.0194    | 0.0477    | -0.0523   | -0.0461   | -0.0164   | -0.0173   | 0.0449    | -0.0287   | -0.0484   | -0.011    | -0.0496   | 0.0324    |
| AAK1     | 0.0042    | -0.0449   | -0.054615 | 0.037285  | -0.05199  | -0.0425   | -0.07735  | -0.07515  | 0.0055    | 0.0245    | -0.08845  | -0.001    | 0.0395    | -0.01515  |
| AAMDC    | 0.0272    | 0.191545  | 0.14435   | 0.1005    | 0.049705  | -0.1145   | -0.0314   | -0.11945  | -0.10465  | 0.0718    | 0.2945    | 0.05085   | 0.0336    | 0.11179   |
| AAMP     | -0.3      | 0.0348    | -0.0539   | -0.164    | -0.135    | 0.101     | -0.0386   | -0.022    | -0.138    | 0.0379    | 0.216     | -0.011    | -0.0731   | -0.0533   |
| AANAT    | 0.0101    | 0.0243    | -0.0483   | -0.0311   | -0.0408   | 0.0787    | -0.00321  | -0.0423   | -0.074    | 0.0147    | -0.0516   | -0.00112  | -0.121    | 0.0248    |
| AAR2     | -0.0205   | 0.0112    | -0.000208 | -0.0299   | 0.00483   | 0.00299   | -0.00266  | -0.0296   | -0.0358   | 0.0081    | -0.0772   | 0.0296    | -0.0353   | -0.0188   |
| AARS     | -0.119    | 0.129     | -0.0697   | -0.0955   | -0.0713   | 0.0496    | -0.0377   | -0.0699   | -0.171    | 0.107     | 0.3       | -0.0578   | -0.117    | -0.0339   |
| AARS2    | 0.017     | 0.0391    | 0.045     | -0.0433   | -0.0247   | 0.0203    | -0.0152   | -0.0218   | -0.0337   | -0.0276   | -0.0519   | -0.0219   | -0.00352  | -0.0678   |
| AARSD1   | -0.0195   | -0.057    | -0.1092   | -0.3725   | 0.0485    | 0.13325   | 0.10925   | 0.0787    | 0.13095   | -0.014665 | 0.05875   | 0.0682    | 0.1515    | 0.107     |
| AASDH    | 0.027233  | -0.008567 | -0.020667 | -0.059267 | -0.0854   | -0.02298  | -0.007567 | 0.0454    | -0.047333 | -0.079867 | 0.4059    | -0.071033 | -0.027533 | -0.11923  |
| AASDHPP1 | -0.077483 | 0.0027    | 0.050263  | -0.113967 | -0.011233 | 0.023933  | 0.039433  | 0.0971    | 0.03516   | 0.024867  | 0.118133  | 0.054933  | 0.019533  | 0.00283   |
| AASS     | 0.0282    | 0.159     | -0.0444   | 0.0921    | 0.0725    | 0.0339    | -0.0384   | 0.054     | 0.261     | 0.0368    | 0.132     | -0.0488   | -0.0812   | -0.0819   |
| AATF     | -0.194    | 0.05195   | -0.0706   | -0.1425   | 0.1216    | 0.1615    | 0.1068    | 0.06875   | -0.10655  | 0.05325   | 0.1305    | 0.01652   | -0.05145  | -0.006454 |
| AATK     | -0.0705   | 0.038533  | 0.05957   | 0.09471   | -0.109333 | -0.076233 | -0.0568   | -0.0691   | 0.149567  | -0.074787 | -0.120333 | 0.056393  | 0.084     | -0.028967 |
| ABAT     | 0.10305   | 0.11255   | 0.115     | 0.054     | -0.0238   | 0.05977   | -0.0672   | 0.02175   | -0.17005  | -0.10194  | 0.1155    | -0.05565  | -0.06225  | 0.01435   |
| ABCA1    | -0.024275 | 0.054984  | -0.054917 | -0.0363   | 0.028134  | 0.039584  | 0.015833  | 0.021916  | -0.008323 | -0.037267 | 0.010834  | 0.00225   | 0.062445  | -0.061217 |
| ABCA10   | -0.0837   | -0.106    | 0.141     | -0.198    | -0.144    | -0.274    | -0.163    | -0.0815   | -0.0472   | -0.164    | -0.137    | -0.0601   | 0.00143   | -0.0378   |
| ABCA11P  | -0.0758   | -0.119    | 0.183     | -0.173    | -0.00636  | -0.155    | -0.0257   | -0.0229   | 0.0465    | -0.0909   | -0.0751   | -0.187    | -0.0898   | -0.112    |
| ABCA12   | -0.0942   | -0.118    | 0.226     | 0         | 0.463     | 0.432     | -0.0696   | 0.288     | 0.108     | -0.0522   | 0.00989   | 0.127     | 0.514     | 0.305     |
| ABCA13   | 0.0587    | -0.09     | 0.0208    | -0.349    | -0.0442   | 0.35      | -0.0435   | 0.0918    | 0.0469    | 0.077     | 0.000374  | 0.315     | 0.121     | 0.6       |
| ABCA2    | -0.0597   | 0.0314    | -0.04     | 0.0327    | -0.175    | -0.121    | -0.175    | -0.24     | -0.126    | -0.0471   | -0.112    | -0.0206   | -0.0437   | -0.094    |
| ABCA3    | 0.0978    | 0.16      | 0.0252    | 0.0286    | -0.188    | -0.0438   | -0.0528   | -0.117    | 0.00623   | 0.0519    | -0.0414   | -0.0267   | -0.386    | -0.0792   |
| ABCA4    | 0.0202    | -0.246    | -0.0184   | 0.239     | -0.105    | -0.233    | 0.0339    | -0.0801   | 0.072     | 0.116     | 0.0335    | 0.145     | 0.142     | 0.39      |
| ABCA5    | 0.0775    | 0.005     | 0.128     | 0.1142    | 0.1695    | -0.122    | -0.073    | -0.028595 | -0.12215  | -0.147    | 0.0205    | -0.04865  | -0.09465  | 0.03875   |
| ABCA6    | 0.226     | 0.195     | 0.0509    | 0.126     | 0.211     | 0.172     | -0.00389  | 0.00198   | -0.04     | 0.28      | 0.379     | 0.0827    | -0.0705   | -0.0206   |
| ABCA7    | -0.109    | 0.0552    | 0.166     | 0.166     | 0.0523    | 0.0544    | 0.0849    | -0.11     | 0.286     | 0.0313    | -0.22     | 0.0612    | 0.201     | 0.0898    |
| ABCA8    | 0.0772    | 0.0444    | 0.219     | 0.304     | 0.258     | 0.17      | 0.0342    | -0.0121   | -0.00143  | 0.144     | 0.075     | 0.31      | 0.266     | 0.193     |
| ABCA9    | 0.05      | -0.422    | -0.115    | -0.0595   | 0.458     | 0         | 0.436     | 0.196     | 0.1       | 0.503     | 0.616     | -0.105    | -0.356    | -0.166    |
| ABCB1    | -0.000332 | 0.0627    | -0.0802   | 0.0526    | 0.0254    | 0.415     | 0.00329   | 0.28      | -0.139    | 0.0603    | 0.263     | -0.0402   | -0.129    | 0.139     |
| ABCB10   | 0.01615   | 0.10258   | -0.01418  | 0.023825  | 0.05975   | -0.019048 | 0.066625  | 0.134875  | 0.029975  | 0.073243  | 0.13575   | 0.1252    | 0.03935   | 0.080025  |
| ABCB11   | 0.00442   | -0.183    | 0.00843   | -0.0121   | 0.000151  | -0.0763   | -0.0315   | -0.0426   | -0.0803   | -0.0431   | -0.076    | -0.0118   | 0.0275    | 0.0235    |
| ABCB4    | 0.165     | 0.0807    | -0.0245   | 0.0699    | 0.136     | 0.369     | 0.0143    | 0.249     | -0.0277   | 0.366     | 0.127     | 0.288     | 0.142     | 0.151     |
| ABCB5    | 0.103     | -0.0849   | 0.00755   | 0         | 0.153     | -0.0717   | -0.127    | -0.296    | -0.196    | 0.406     | 0.174     | 0.149     | 0.208     | 0.135     |
| ABCB6    | -0.03845  | 0.02485   | -0.06415  | -0.032455 | -0.09485  | -0.205    | -0.0668   | -0.2565   | -0.0807   | -0.035775 | -0.08145  | -0.018882 | -0.060819 | 0.017905  |
| ABCB7    | 0.0859    | 0.0264    | 0.0885    | 0.0156    | 0.0143    | -0.0348   | -0.00159  | 0.0283    | 0.0545    | 0.092     | 0.184     | 0.112     | -0.0749   | 0.0301    |
| ABCB8    | 1.37      | -0.256    | -0.0386   | -0.0826   | -0.181    | -0.117    | 0.0142    | -0.089    | -0.198    | -0.0584   | 0.617     | -0.219    | -0.0226   | -0.157    |
| ABCB9    | 0.05825   | 0.1435    | 0.10985   | 0.1117    | 0.04805   | 0.1181    | 0.02285   | 0.06063   | 0.1272    | 0.0667    | -0.00975  | 0.05045   | 0.05935   | 0.03134   |
| ABCC1    | -0.0401   | 0.00802   | 0.476     | 0.187     | -0.348    | -0.159    | -0.0676   | -0.139    | -0.0545   | 0.0618    | -0.0608   | 0.387     | 0.215     | 0.245     |
| ABCC10   | -0.0144   | -0.144    | -0.0252   | -0.0355   | -0.0309   | -0.0422   | 0.000469  | -0.0303   | -0.0456   | 0.0185    | -0.0162   | -0.0495   | 0.0489    | -0.0655   |
| ABCC11   | 0.0832    | -0.116    | 0.0509    | -0.131    | 0.029     | 0.254     | -0.099    | 0.0229    | -0.161    | -0.0272   | 0.361     | 0.0485    | -0.12     | 0.09      |
| ABCC12   | 0.539     | -0.214    | 0.154     | 0         | -0.403    | -0.0595   | -0.00643  | 0         | -0.0589   | -0.316    | -0.254    | 0.0269    | 0         | 0.373     |
| ABCC13   | -0.027953 | 0.024     | -0.016253 | 0.03      | 0.047767  | -0.0203   | 0.022     | 0.0463    | -0.032443 | -0.014333 | -0.002167 | -0.000767 | -0.089633 | 0.025474  |
| ABCC2    | 0.04045   | 0.1804    | 0.05535   | 0.0021    | -0.034915 | -0.017065 | -0.02148  | -0.0455   | -0.02481  | 0.10355   | 0.03185   | -0.0367   | -0.00805  | -0.12715  |
| ABCC3    | 0.102     | -0.177    | 0.022     | -0.0529   | -0.254    | -0.201    | 0.0978    | -0.0782   | -0.242    | 0.0127    | 0.0382    | -0.163    | -0.0861   | -0.0242   |
| ABCC4    | -0.225333 | -0.417667 | 0.0972    | -0.05     | -0.124    | -0.2021   | -0.114533 | -0.081    | -0.208433 | -0.364667 | -0.405    | 0.1274    | 0.036     | 0.167367  |

**Figure S3. Study file example**

The next step is to define the tool parameters (Figure S4). While setting up the parameters, the user may choose the type of meta-analysis. The univariate meta-analysis is the default type. For multivariate meta-analysis, the user may select YES in the multivariate meta-analysis option. Moreover, the user may choose the level of significance from the drop-down menu, select the multiple comparison correction methods, and perform functional enrichment analysis. When all parameters were set, the user should click the execute button (Optionally the user may enter an email address to get the results). In this scenario, we conducted univariate meta-analysis with 0.01 level of significance, selecting all the multiple comparison correction methods, and performing functional enrichment analysis using the Benjamini – Hochberg FDR significance threshold.

Provides additional controls.

Annotation / Define the subject's class for controls and cases

Control Class

CONTROL

Case Class

CASE

Case2 Class

CASE2

Only for Multivariate Analysis

Meta-analysis options

Select Level of Significance of Multiple Comparisons:

0.01

⬆

Select multiple comparison Type:

All

⬆

One step: Bonferroni, Sidak, **Step Up**: Simes, Hochberg, **Step Down**: Holm, Holland.

Select If Multivariate Analysis is running

NO

⬆

Provides additional controls.

Set Functional Enrichment Analysis

YES

⬆

Email address:

Enter your email address to get notification of results:

✓ Execute

Figure S4. Web Interface tool parameters.

## **PART B – Meta-analysis Results**

The results file contains information about the Effect size, the Standard Error, the  $z$ -value, the  $p$ -value, the metrics for heterogeneity and the statistical significance of each gene according to the  $p$ -value of each correction method (Holmes, Bonferroni, FDR/Simes etc.) (Figure 5). The Effect size reveals which genes are overexpressed (the genes with a positive value) or underexpressed (the genes with negative value). In our example, differentially expressed genes (DEGs) were considered those identified at a False Discovery Rate of 0.01, which is shown in the column “Simes”. The number 1 indicates the statistically significant DEGs and the 0 the non-statistically significant DEGs (the same for Holmes, Bonferroni, and the other correction methods). Meta-analysis identified 739 DEGs associated with preeclampsia. The molecular interactions among these DEGs and the biochemical pathways in which these genes participate were investigated with functional enrichment analysis. Finally, histograms were used to portray the measures of heterogeneity (Figure 6) and qqplot that shows the theoretical distribution of the corrected effect sizes compared against the actual

distribution of the corrected effect sizes (Figure S7). Also, the volcano plot is available depicting the effect sizes against the negative decimal logarithm ( $-\log_{10}$ ) of the  $p$ -values (Figure S8).

| Genes    | Effect size (Hedge's g) | Standard_Error | Q        | I_Squared | Tau_Squared | p_Q_value | z_test_value | p_value | bonferroni | sidak | holm | holland | hochberg | simes |
|----------|-------------------------|----------------|----------|-----------|-------------|-----------|--------------|---------|------------|-------|------|---------|----------|-------|
| A1BG     | -0.187483812            | 0.124675674    | 10.65026 | 24.88     | 0.03300505  | 0.225     | 1.503772199  | 0.139   | 0          | 0     | 0    | 0       | 0        | 0     |
| A1BG_AS1 | -0.464371052            | 0.23264274     | 0.790917 | 0         | 0           | 0.851     | 1.996069387  | 0.046   | 0          | 0     | 0    | 0       | 0        | 0     |
| A1CF     | -0.05634002             | 0.175202881    | 23.94549 | 62.41     | 0.17268501  | 0.004     | 0.321570169  | 0.748   | 0          | 0     | 0    | 0       | 0        | 0     |
| A2M      | -0.361338851            | 0.17602856     | 23.95134 | 62.42     | 0.17440305  | 0.004     | 2.052728544  | 0.04    | 0          | 0     | 0    | 0       | 0        | 1     |
| A2ML1    | 0.100899543             | 0.13155626     | 11.64866 | 31.32     | 0.04536663  | 0.173     | 0.766968765  | 0.445   | 0          | 0     | 0    | 0       | 0        | 0     |
| A4GALT   | 0.071338351             | 0.125804837    | 12.96911 | 30.6      | 0.04501624  | 0.17      | 0.567055706  | 0.572   | 0          | 0     | 0    | 0       | 0        | 0     |
| A4GNT    | 0.150358024             | 0.103690355    | 8.481419 | 5.68      | 0.00582605  | 0.389     | 1.450067596  | 0.154   | 0          | 0     | 0    | 0       | 0        | 0     |
| AAAS     | -0.182881964            | 0.201491671    | 31.56084 | 71.48     | 0.26466705  | 0         | 0.907640315  | 0.366   | 0          | 0     | 0    | 0       | 0        | 0     |
| AACS     | 0.054171429             | 0.097786       | 5.796878 | 0         | 0           | 0.67      | 0.553979391  | 0.58    | 0          | 0     | 0    | 0       | 0        | 0     |
| AADAC    | 0.087611513             | 0.158216439    | 16.68008 | 52.04     | 0.106149    | 0.034     | 0.553744688  | 0.58    | 0          | 0     | 0    | 0       | 0        | 0     |
| AADACL2  | 0.212328147             | 0.109663242    | 6.10259  | 1.68      | 0.00163949  | 0.413     | 1.936183376  | 0.053   | 0          | 0     | 0    | 0       | 0        | 0     |
| AADAT    | 0.081504594             | 0.258347902    | 35.8873  | 80.49     | 0.39974553  | 0         | 0.315483861  | 0.753   | 0          | 0     | 0    | 0       | 0        | 0     |
| AAED1    | -0.181036976            | 0.273535618    | 28.4666  | 78.92     | 0.3765811   | 0         | 0.661840594  | 0.508   | 0          | 0     | 0    | 0       | 0        | 0     |
| AAGAB    | 0.078658842             | 0.151484908    | 15.3819  | 47.99     | 0.08993425  | 0.052     | 0.519252005  | 0.604   | 0          | 0     | 0    | 0       | 0        | 1     |
| AAK1     | 0.041828521             | 0.188381777    | 17.9377  | 60.98     | 0.15629099  | 0.013     | 0.222041227  | 0.825   | 0          | 0     | 0    | 0       | 0        | 1     |
| AAMDC    | -0.312541845            | 0.107029493    | 8.734696 | 8.41      | 0.00902262  | 0.367     | 2.920146927  | 0.004   | 0          | 0     | 0    | 0       | 0        | 0     |
| AAMP     | -0.094961823            | 0.23049829     | 34.84092 | 77.04     | 0.33760929  | 0         | 0.411984936  | 0.681   | 0          | 0     | 0    | 0       | 0        | 0     |
| AANAT    | 0.254716422             | 0.171089418    | 19.18733 | 58.31     | 0.13899459  | 0.015     | 1.488791213  | 0.143   | 0          | 0     | 0    | 0       | 0        | 0     |
| AAR2     | -0.174780083            | 0.132059733    | 11.99427 | 33.3      | 0.04860457  | 0.159     | 1.323492626  | 0.188   | 0          | 0     | 0    | 0       | 0        | 0     |
| AARS     | 0.073040255             | 0.166558083    | 18.3289  | 56.35     | 0.12694764  | 0.019     | 0.438527233  | 0.662   | 0          | 0     | 0    | 0       | 0        | 0     |
| AARS2    | -0.025722358            | 0.101091297    | 6.857593 | 0         | 0           | 0.445     | 0.254446805  | 0.799   | 0          | 0     | 0    | 0       | 0        | 1     |
| AARSD1   | 0.210028491             | 0.264434632    | 20.88218 | 71.27     | 0.32733657  | 0.002     | 0.794254861  | 0.428   | 0          | 0     | 0    | 0       | 0        | 0     |
| AASDH    | -0.155280198            | 0.154850122    | 12.90514 | 45.76     | 0.07965925  | 0.075     | 1.002777369  | 0.317   | 0          | 0     | 0    | 0       | 0        | 0     |
| AASDHPP1 | -0.257812739            | 0.243648023    | 37.86854 | 78.87     | 0.38453311  | 0         | 1.058135978  | 0.291   | 0          | 0     | 0    | 0       | 0        | 0     |
| AASS     | -0.020126664            | 0.099814004    | 8.154321 | 1.89      | 0.0018639   | 0.419     | 0.201641682  | 0.84    | 0          | 0     | 0    | 0       | 0        | 0     |

**Figure S5. Meta-analysis results file.** This table provides detailed information about the results from meta-analysis for each gene: the effect size, the standard error, the metrics for heterogeneity ( $Q$ ,  $I$  squared and Tau Squared), the  $p$ -value for heterogeneity ( $p$ - $q$ -value), the  $z$  test value, the  $p$ -value, and the results per method of corrected  $p$ -values.

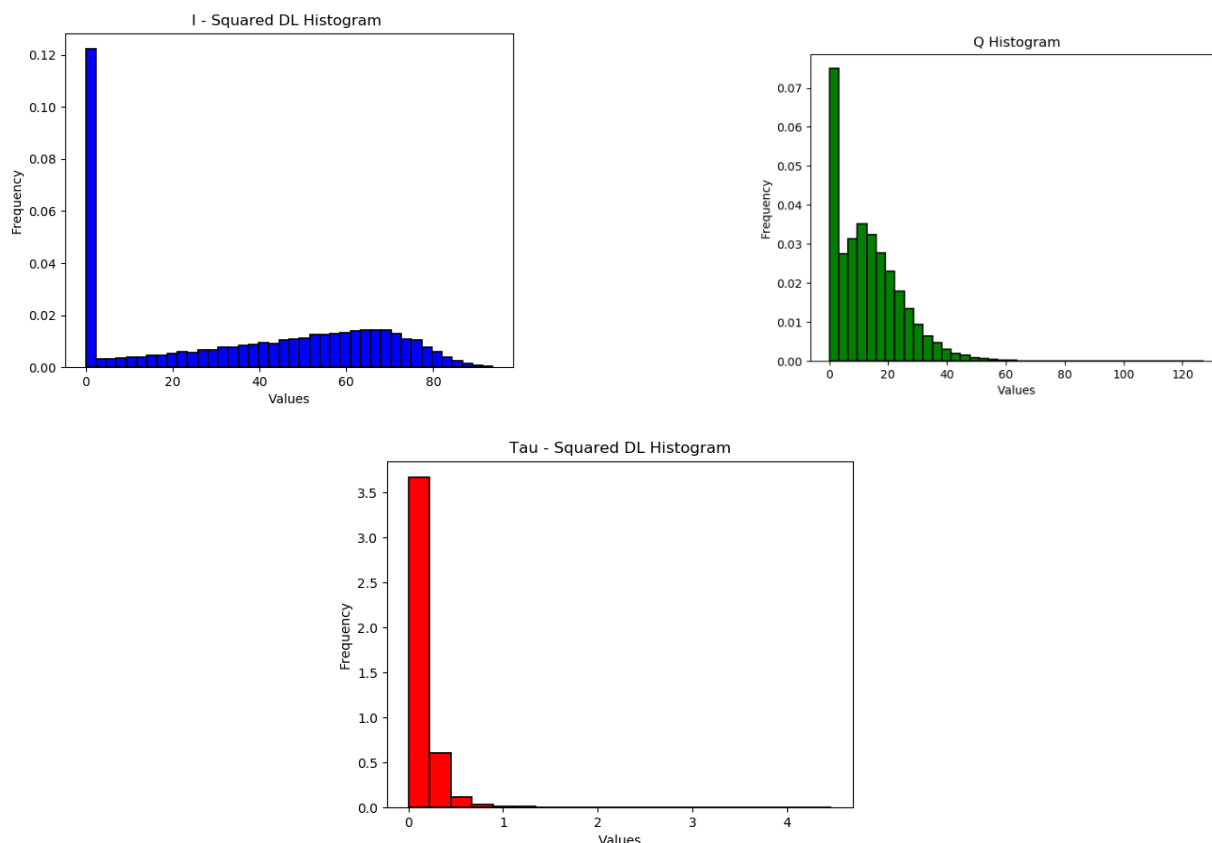

**Figure S6.** Heterogeneity histograms for  $I$ -Squared, Tau-Squared and  $Q$  as shown in the meta-analysis results.

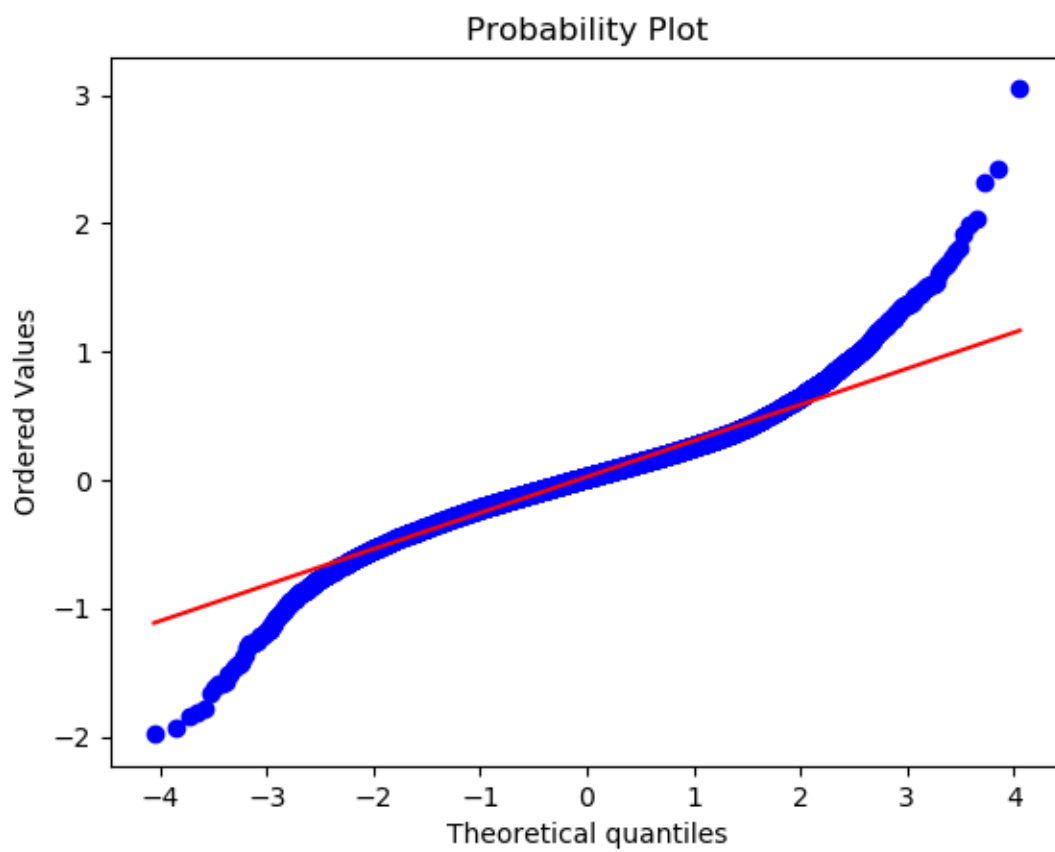

Figure S7. QQ plot

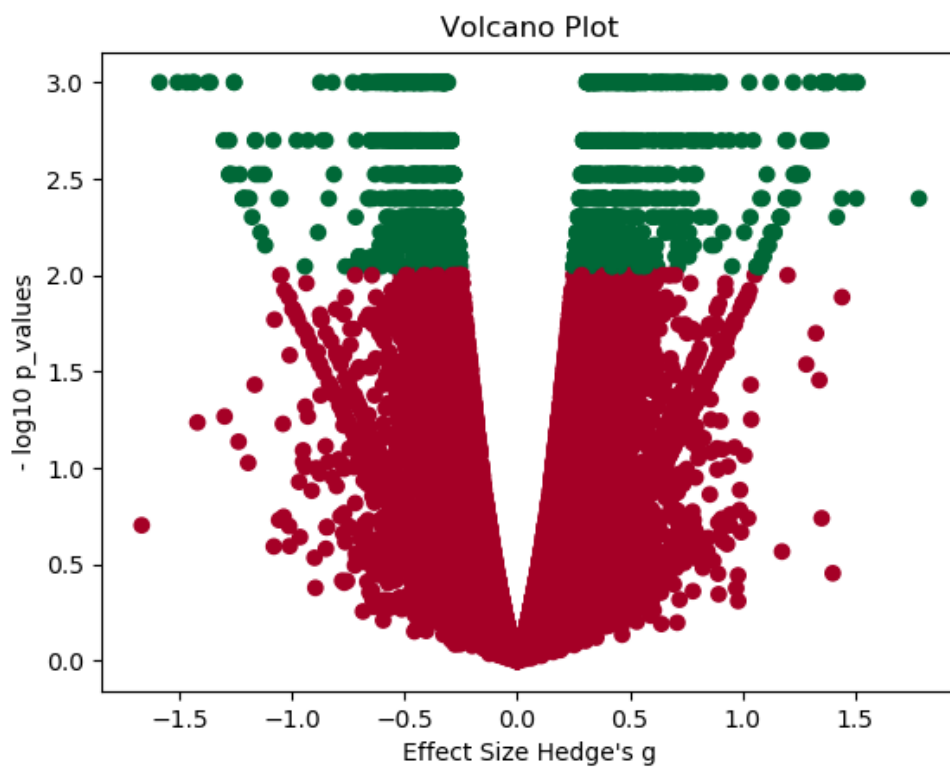

Figure S8. Volcano plot

## PART C - Functional Enrichment Analysis

We also performed functional enrichment analysis, also known as over-representation analysis (ORA), or gene set enrichment analysis, using the differentially expressed genes (DEGs) derived from the meta-analysis. The functional enrichment analysis of the input gene list is performed using the g:Profiler toolkit in python using the g:GOST core tool that detects statistically significantly enriched biological processes, molecular functions, cellular components, biological pathways, regulatory motifs and protein complexes using a hypergeometric test with default parameters ( $\alpha = 0.01$ , enrichment\_analysis = YES, organism = hsapiens, threshold = 0.05, threshold\_method=fdr).

The enrichment results in g:GOST are highlighted in a Manhattan plot (Figure S9). The enrichment results are presented in a Manhattan Plot with all significant terms identified per source and it is accompanied by a more extensive readable output format with detailed information about every term with gene list and p-values. Each functional enriched term is derived from the most common data sources which are regularly updated such as Gene Ontology, KEGG, Reactome, WikiPathways, miRTarBase, TRANSFAC, Human Protein Atlas, CORUM, and the Human Phenotype Ontology. Furthermore, a heatmap visualization illustrates results for genes participating in significant enrichment terms (Figure S10).

In more detail, enrichment analysis returned DEGs that are highly overrepresented in terms in GO biological processes, molecular functions, cellular components and regulatory motifs (GO:BP, GO:MF, GO:CC, TF). There weren't any significant results in functional terms from KEGG, Reactome, WikiPathways, miRTarBase, Human Protein Atlas, CORUM, and the Human Phenotype Ontology sources. The top 5 significant terms at each source are represented in Table S1 with the corresponding heatmap visualization per source in Figure S10.

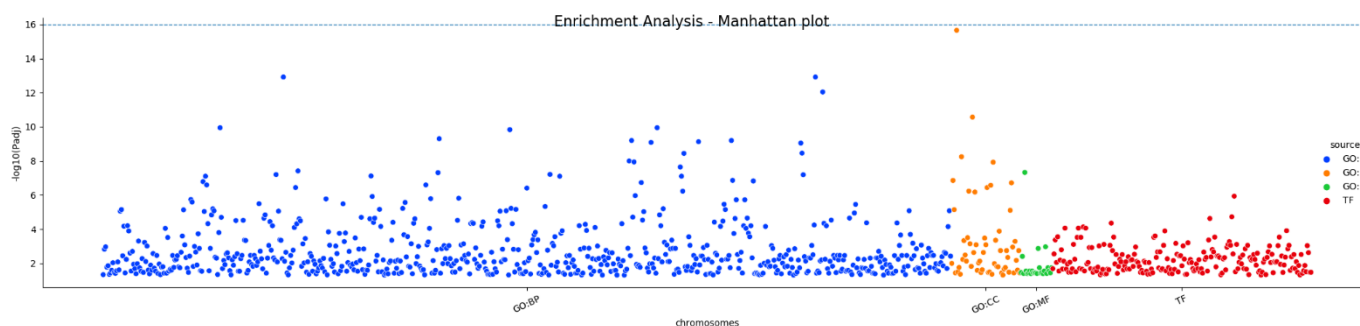

**Figure S9. Manhattan Plot.** This plot maps genes to known functional information sources and detects statistically significant enriched terms using the well-proven cumulative hypergeometric test. The x-axis shows the functional terms, and the y-axis shows the corresponding enrichment p-values in negative log10 scale. Each circle represents the significant functional term across all the analysed term categories. The circles are colour-grouped by data source.

**Table S1. Functional enrichment output.** The first 5 significant terms are shown for Gene Ontology (Biological Processes (BP), Molecular Function (MF), Cellular Component (CC) and Transcription Factor Regulatory Motifs source with term name, ID and adjusted p-values.

| source | term_name                              | term_id    | adjusted_p_value | negative_log10_of_adjusted_p_value |
|--------|----------------------------------------|------------|------------------|------------------------------------|
| GO:BP  | response to organic substance          | GO:0010033 | 5.54E-07         | 6.256117189                        |
| GO:BP  | cellular response to chemical stimulus | GO:0070887 | 1.25257E-06      | 5.902196824                        |
| GO:BP  | response to chemical                   | GO:0042221 | 4.66537E-06      | 5.331113705                        |
| GO:BP  | cellular response to organic substance | GO:0071310 | 1.01484E-05      | 4.993600908                        |
| GO:BP  | multicellular organism development     | GO:0007275 | 0.002198326      | 2.657907808                        |
| GO:CC  | vesicle                                | GO:0031982 | 3.24914E-05      | 4.488232185                        |
| GO:CC  | cytoplasm                              | GO:0005737 | 5.69367E-05      | 4.244607716                        |



|       |                                                           |             |             |             |
|-------|-----------------------------------------------------------|-------------|-------------|-------------|
| GO:CC | endomembrane system                                       | GO:0012505  | 0.000145738 | 3.83642802  |
| GO:CC | cytoplasmic vesicle                                       | GO:0031410  | 0.000193625 | 3.713038346 |
| GO:CC | integral component of plasma membrane                     | GO:0005887  | 0.000193625 | 3.713038346 |
| GO:MF | monosaccharide binding                                    | GO:0048029  | 0.004247765 | 2.371839509 |
| GO:MF | peptidyl-proline dioxygenase activity                     | GO:0031543  | 0.019347834 | 1.713367656 |
| GO:MF | L-ascorbic acid binding                                   | GO:0031418  | 0.019347834 | 1.713367656 |
| GO:MF | procollagen-proline dioxygenase activity                  | GO:0019798  | 0.023866897 | 1.622204046 |
| GO:MF | peptidyl-proline 4-dioxygenase activity                   | GO:0031545  | 0.033468303 | 1.475366311 |
| TF    | Factor: MAZ; motif: GGGMGGGGSSGGGGGGGGGGG; match class: 1 | TF:M09636_1 | 9.57247E-05 | 4.018976204 |
| TF    | Factor: PATZ; motif: GGGGNGGGGMKGGRRNGGNRN                | TF:M10026   | 0.000143196 | 3.844068332 |
| TF    | Factor: MAZ; motif: GGGMGGGGSSGGGGGGGGGGG                 | TF:M09636   | 0.000936755 | 3.028373962 |
| TF    | Factor: MAZ; motif: GGGGGAGGGGGNGRGGRRRGNRG               | TF:M09984   | 0.000936755 | 3.028373962 |
| TF    | Factor: GKLF; motif: NNNRGGNGNGGSN; match class: 1        | TF:M07289_1 | 0.001458223 | 2.836175963 |

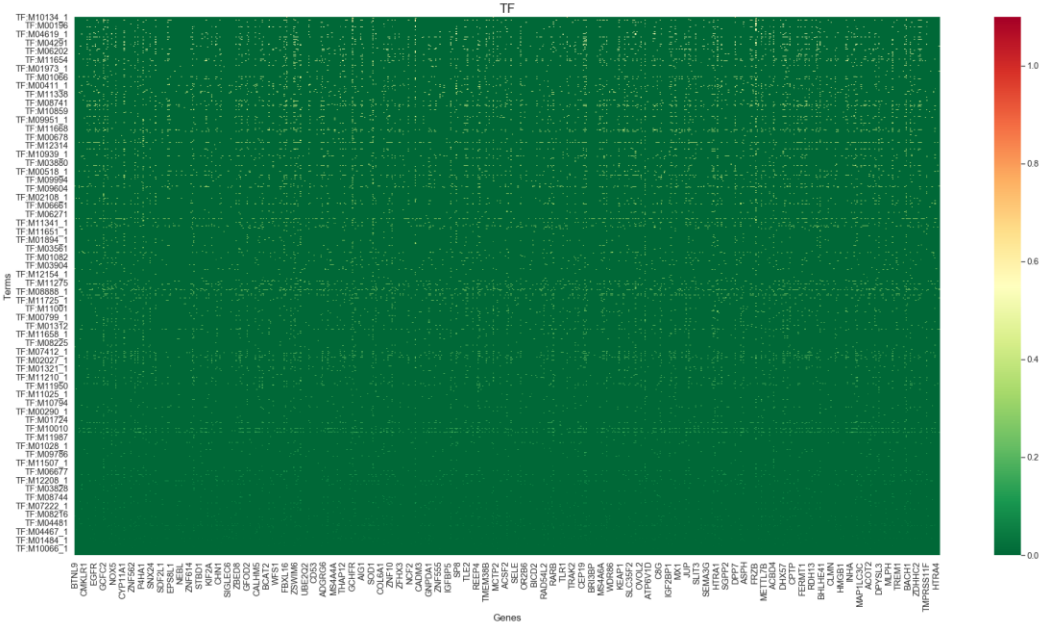

**Figure S10.** Heatmap plot of regulatory motifs in DNA according to putative transcription factor binding sites (TFBSs) from TRANSFAC database (TF). In the x-axis there are genes enriched for terms of TF in y-axis.

## References

1. Guo, L., et al., *Differentially expressed microRNAs and affected biological pathways revealed by modulated modularity clustering (MMC) analysis of human preeclamptic and IUGR placentas*. Placenta, 2013. **34**(7): p. 599-605.
2. Jebbink, J.M., et al., *Increased glucocerebrosidase expression and activity in preeclamptic placenta*. Placenta, 2015. **36**(2): p. 160-9.
3. Leavey, K., et al., *Unsupervised Placental Gene Expression Profiling Identifies Clinically Relevant Subclasses of Human Preeclampsia*. Hypertension, 2016. **68**(1): p. 137-47.
4. Liang, M., et al., *Gene expression profiling reveals different molecular patterns in G-protein coupled receptor signaling pathways between early- and late-onset preeclampsia*. Placenta, 2016. **40**: p. 52-9.
5. Meng, T., et al., *Identification of differential gene expression profiles in placentas from preeclamptic pregnancies versus normal pregnancies by DNA microarrays*. OMICS, 2012. **16**(6): p. 301-11.
6. Nishizawa, H., et al., *Comparative gene expression profiling of placentas from patients with severe pre-eclampsia and unexplained fetal growth restriction*. Reprod Biol Endocrinol, 2011. **9**: p. 107.
7. Nishizawa, H., et al., *Microarray analysis of differentially expressed fetal genes in placental tissue derived from early and late onset severe pre-eclampsia*. Placenta, 2007. **28**(5-6): p. 487-97.
8. Sitras, V., et al., *Differential placental gene expression in severe preeclampsia*. Placenta, 2009. **30**(5): p. 424-33.
9. Tsai, S., et al., *Transcriptional profiling of human placentas from pregnancies complicated by preeclampsia reveals dysregulation of sialic acid acetyltransferase and immune signalling pathways*. Placenta, 2011. **32**(2): p. 175-82.
10. Winn, V.D., et al., *Severe preeclampsia-related changes in gene expression at the maternal-fetal interface include sialic acid-binding immunoglobulin-like lectin-6 and pappalysin-2*. Endocrinology, 2009. **150**(1): p. 452-62.
11. Vennou, K.E., et al., *Meta-analysis of gene expression profiles in preeclampsia*. Pregnancy Hypertens, 2020. **19**: p. 52-60.
